# Supplementary material for: Optimized Administration of the M4 PAM VU0467154 Demonstrates Broad Efficacy, but Limited Effective Concentrations in Mecp2+/– Mice
Source: PubMed Central journal article supplement — ACS Chem Neurosci. 2022 Jun 7;13(13):1891–901. doi: 10.1021/acschemneuro.2c00113 (PMC9266622; doi:10.1021/acschemneuro.2c00113), 2022-06-07
Supplement: cn2c00113_si_001.pdf [file cn2c00113_si_001.pdf]

**Title:** Optimized administration of the M<sub>4</sub> PAM VU0467154 demonstrates broad efficacy, but limited effective concentrations in *Mecp2*<sup>+/-</sup> mice

**Authors:** Jakub Cikowski<sup>1,2\*</sup>, Calista Holt<sup>1,2\*</sup>, Bright Arthur<sup>3,4,5</sup>, Mackenzie Smith<sup>1,2</sup>, Sonia Gonzalez<sup>1,2</sup>, Craig W. Lindsley<sup>3,4,5,6,7</sup>, Colleen M. Niswender<sup>3,4,5,6,8</sup>, and Rocco G. Gogliotti<sup>1,2,3,4\*\*</sup>

\*denotes co-first authorship

<sup>1</sup>Department of Molecular Pharmacology and Neuroscience, Loyola University Chicago, Maywood, IL 60153, USA

<sup>2</sup>Edward Hines Jr. VA Hospital, Hines, Illinois 60141, USA

<sup>3</sup>Department of Pharmacology, Vanderbilt University, Nashville, TN 37232, USA

<sup>4</sup>Warren Center for Neuroscience Drug Discovery, Vanderbilt University, Nashville, TN 37232, USA

<sup>5</sup>Vanderbilt Kennedy Center, Vanderbilt University Medical Center, Nashville, TN 37232, USA

<sup>6</sup>Vanderbilt Institute of Chemical Biology, Vanderbilt University, Nashville, TN 37232, USA

<sup>7</sup>Department of Chemistry, Vanderbilt University, Nashville, TN 37232, USA

<sup>8</sup>Vanderbilt Brain Institute, Vanderbilt University, Nashville, TN 37232, USA

\*\*Corresponding Author: [rgogliotti@luc.edu](mailto:rgogliotti@luc.edu)

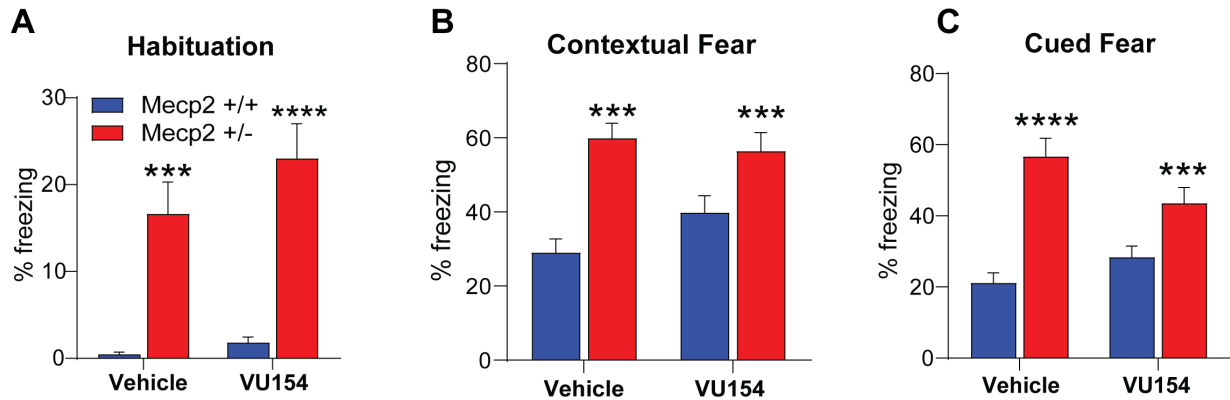

**Figure S1. Chronic vehicle and VU154 administration decrease freezing responses in *Mecp2*<sup>+/-</sup> control mice.** Fear conditioning. N=13-15 / genotype / treatment. **A)** Similar to acute studies, VU154 administration increased immobility during the habituation phase of the fear conditioning assay in *Mecp2*<sup>+/-</sup> mice. **B-C)** Independent of treatment, contextual freezing behavior in *Mecp2*<sup>+/-</sup> mice presented at only 30%. This stands in stark contrast to acute studies (Fig 2F), where ~80% freezing was observed under identical assay conditions. By comparison, *Mecp2*<sup>+/-</sup> mice froze ~60% of the time with both acute and chronic treatment. Similar results were also observed in the cued conditioning assay. The change in baseline freezing of controls complicates the analysis of this data set. Two-way ANOVA with Tukey post hoc analysis \*\*\*p<0.001, \*\*\*\*p<0.0001. Data are expressed as mean ± SEM.
